# Supplementary material for: S100P interacts with integrin α7 and increases cancer cell migration and invasion in lung cancer
Source: PubMed Central journal article supplement (PMC4745748; doi:10.18632/oncotarget.4987), 2015-07-21
Supplement: oncotarget-06-29585-s001.pdf [file oncotarget-06-29585-s001.pdf]

# S100P interacts with integrin $\alpha 7$ and increases cancer cell migration and invasion in lung cancer

## Supplementary Material

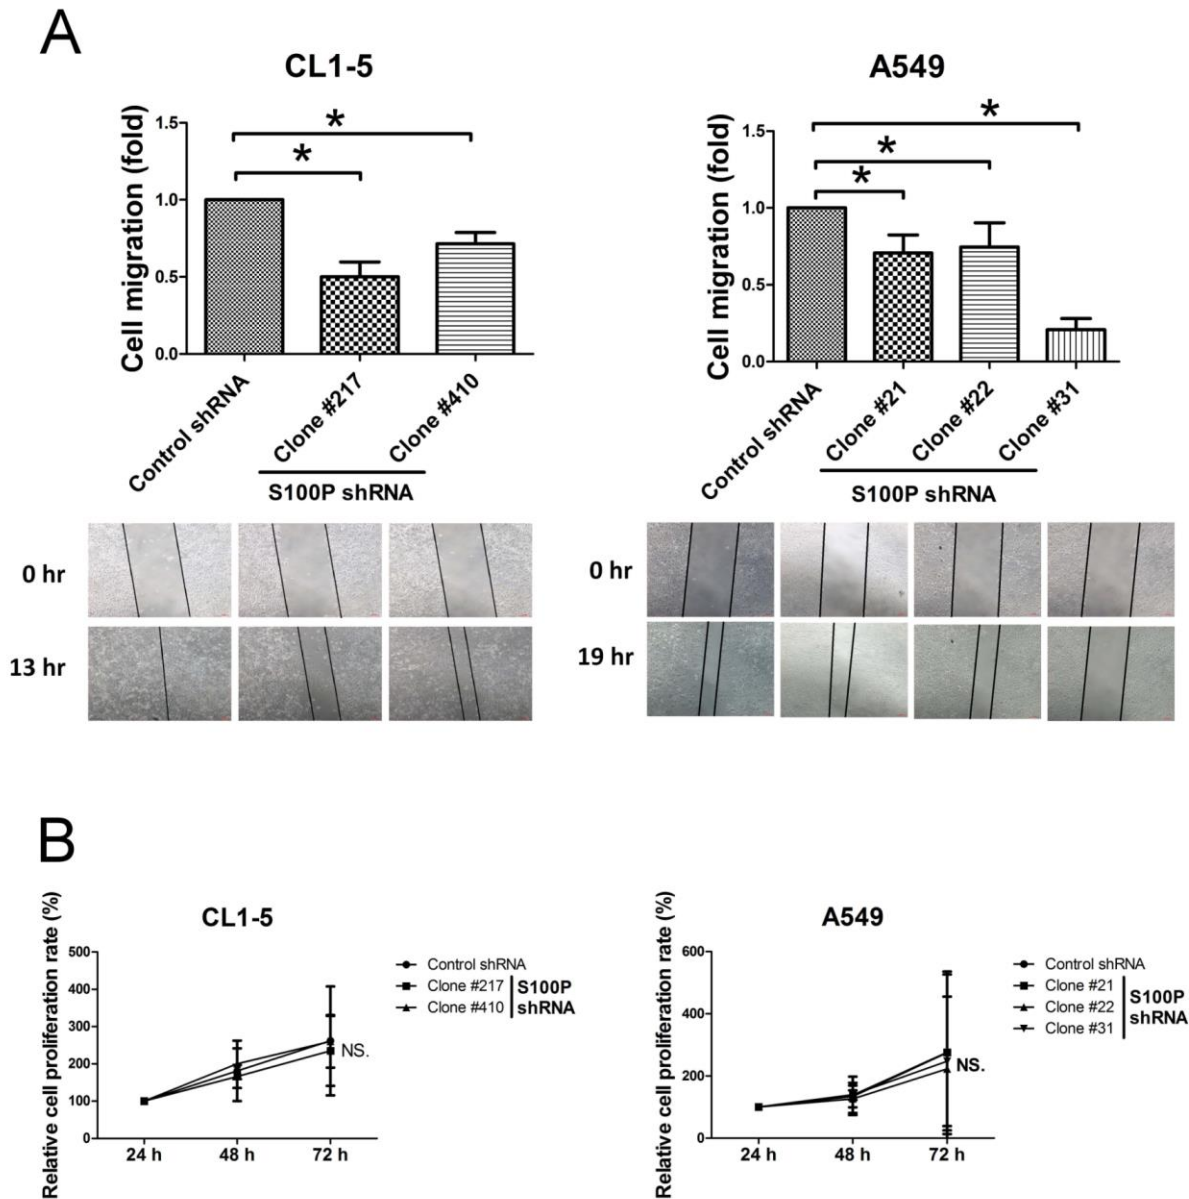

**Figure 1. Inhibition of S100P reduced cell migration.** Knockdown of S100P (A) decreased cell migration, but (B) did not affect cell proliferation in CL1-5 and A549 cells, as assessed by wound-healing assay or by WST-1 for indicated times. Data were as the mean $\pm$ SD. \* $p$ <0.05 or significant difference between control and test groups; ns, non-significant

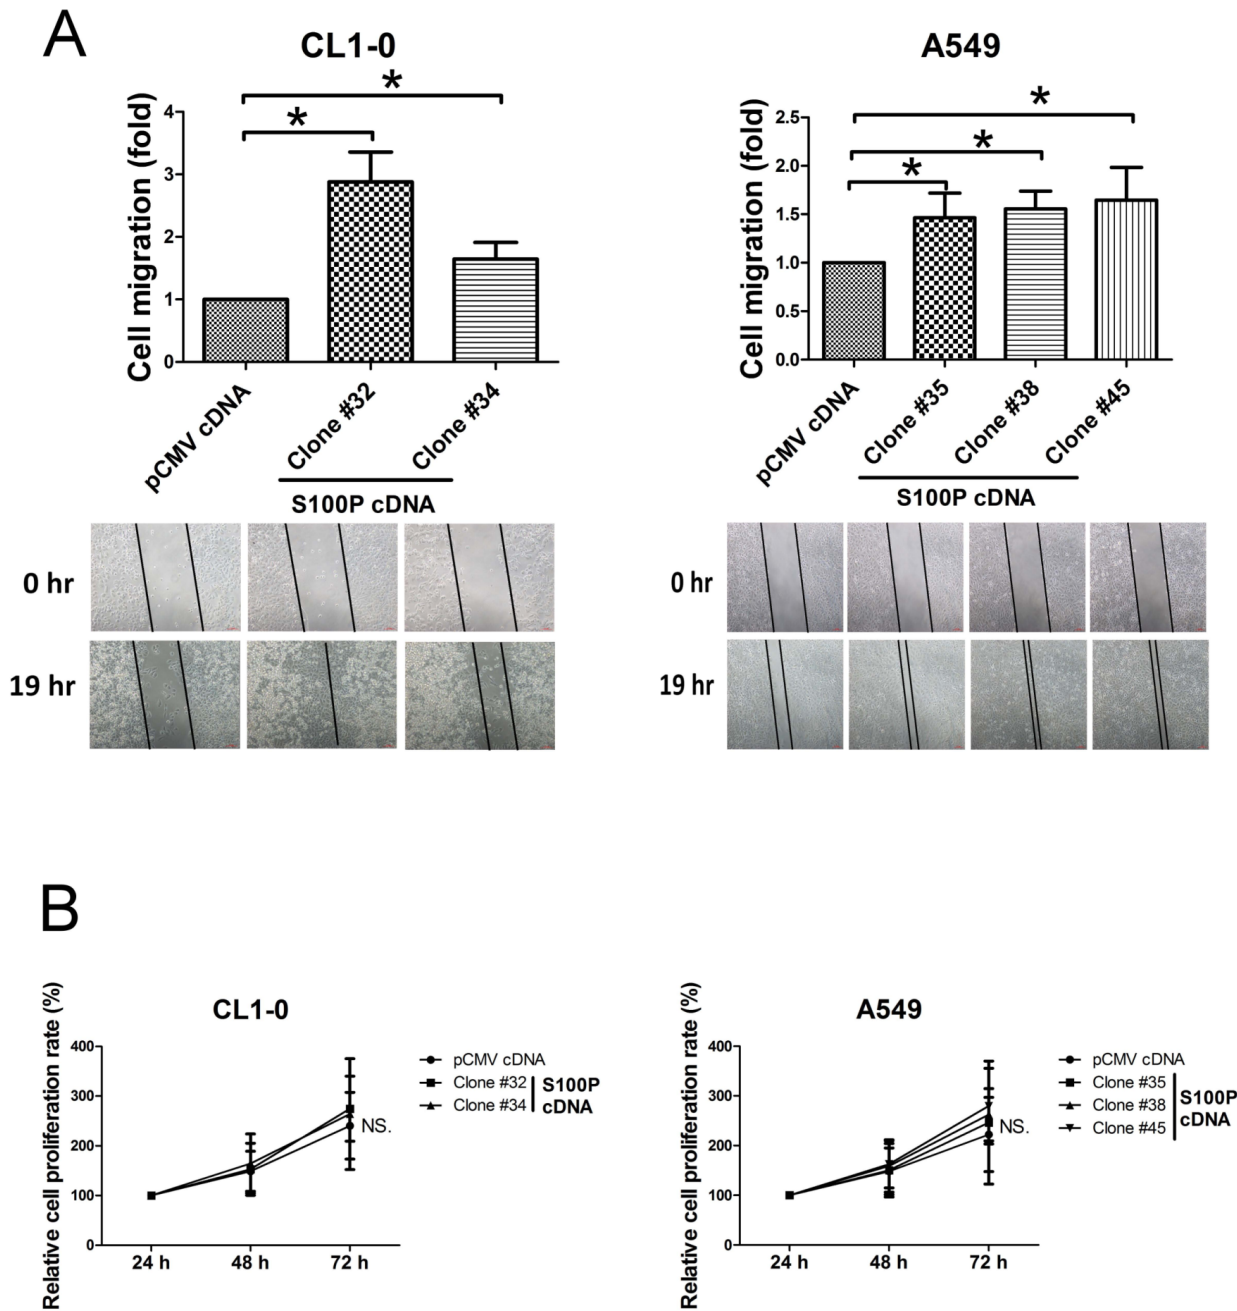

**Figure 2. Overexpression of S100P increased cell migration.** Elevated S100P (A) enhanced cell migration, but (B) did not affect cell proliferation in CL1-0 and A549 cells, as assessed by wound healing assay or by WST-1 for indicated times. Data were provided as the mean±SD. \* $p < 0.05$  or significant difference between control and test groups; ns, non-significant

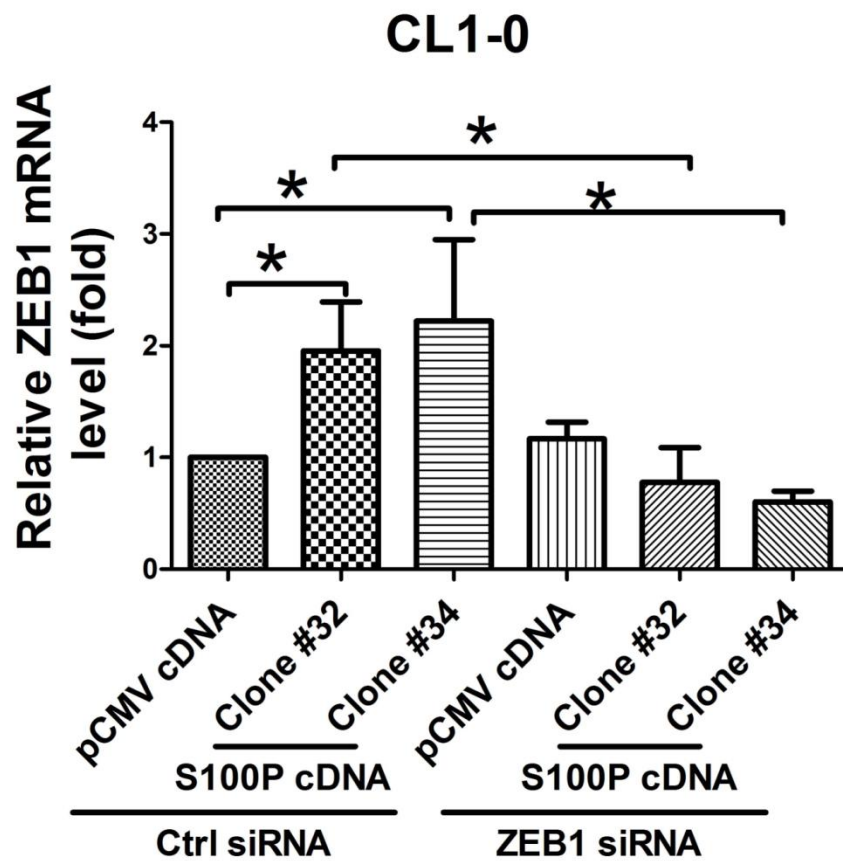

**Figure 3. The expression of ZEB1.** S100P overexpressing CL1-0 cells were transfected with either control or ZEB1 siRNA. The mRNA level of ZEB1 was determined by qRT-PCR 24 h after transfection. Data were as the mean±SD. \* $p < 0.05$ , or a significant difference between the two test groups

A

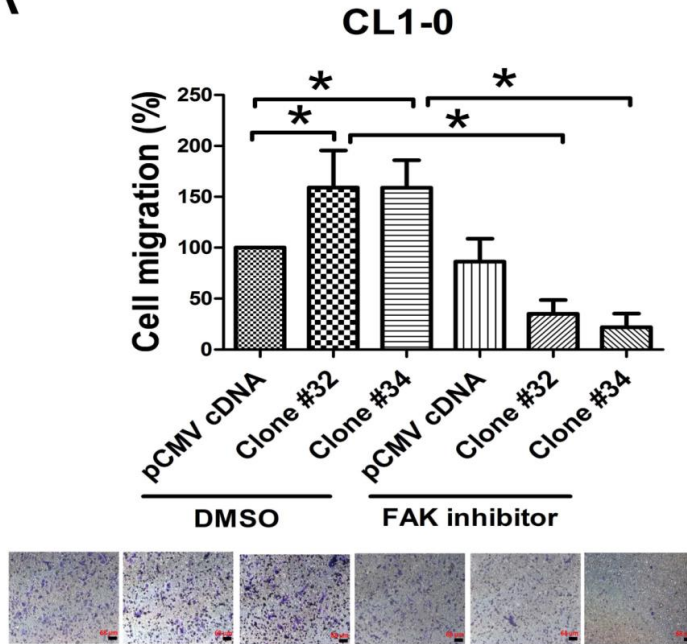

B

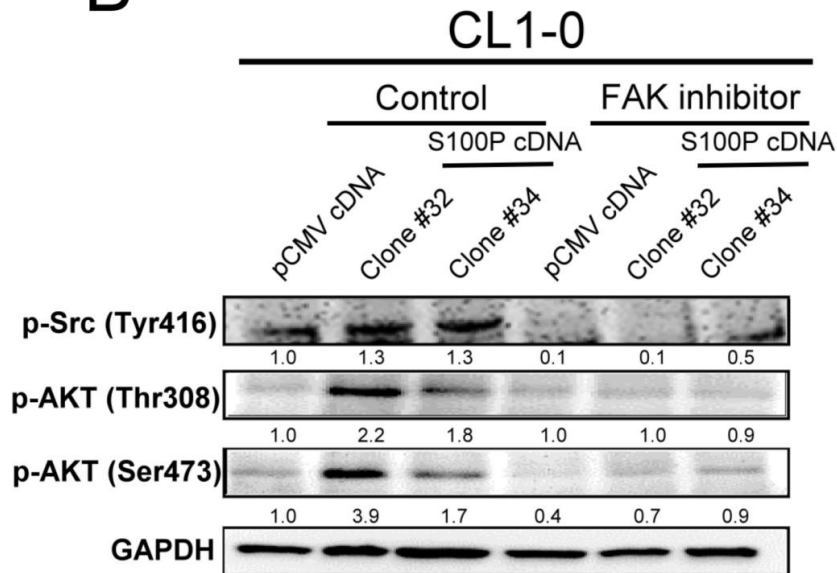

**Figure 4. The role of FAK on cell migration and activation of Src and AKT.** S100P overexpressing CL1-0 cells were treated with FAK inhibitors (20  $\mu$ M) and cell migration was assessed by the transwell system. The levels of various protein were assessed by immunoblot. Data were as mean $\pm$ SD. \* $p$ <0.05, or a significant difference between the two test groups.

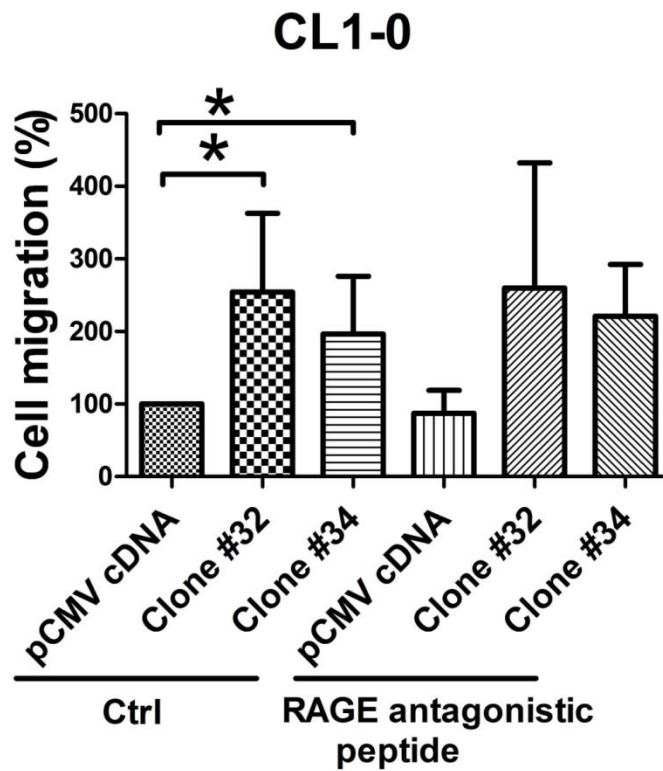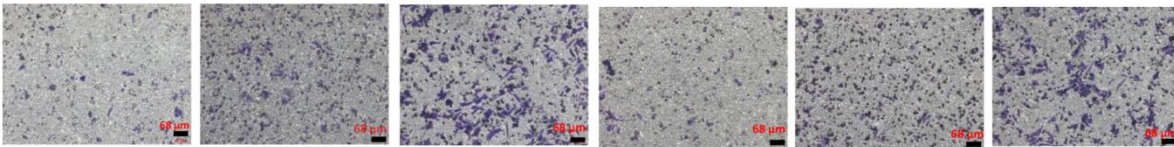

**Figure 5. RAGE inhibition did not affect the S100P induced cell migration.** S100P overexpressing CL1-0 cells were treated with RAGE inhibitors and cell migration was assessed by the transwell system. Data were as mean±SD. \* $p < 0.05$ , or a significant difference between the two test groups.

**Table 1.** The mRNA transcript of S100P in non-tumor and tumor region in a cDNA array of lung cancer patients

|               | <b>S100P</b> |                                        |       |                                       |       |                                      |       |
|---------------|--------------|----------------------------------------|-------|---------------------------------------|-------|--------------------------------------|-------|
|               | N            | <b>High expression in tumor region</b> |       | <b>Low expression in tumor region</b> |       | <b>No difference in tumor region</b> |       |
|               |              | n                                      | %     | n                                     | %     | n                                    | %     |
| <b>Tumor</b>  | 24           | 13                                     | 54.2% | 7                                     | 29.2% | 4                                    | 16.6% |
| <b>Gender</b> | 24           |                                        |       |                                       |       |                                      |       |
| Male          | 16           | 10                                     | 62.5% | 4                                     | 25.0% | 2                                    | 12.5% |
| Female        | 8            | 3                                      | 37.5% | 3                                     | 37.5% | 2                                    | 25.0% |
